# Supplementary material for: Preparation of carbon nano-onions by the low-temperature unfolding of MWCNTs via interaction with theraphthal
Source: Royal Society of Chemistry journal article supplement (doi:10.1039/c5ra07687k), 2015-01-01
Supplement: c5ra07687k1.pdf [file c5ra07687k1.pdf]

### Supplementary material captions

**S1.** Possible formation mechanism for carbon nano-onions and other products in TP-MWCNTs dispersions.

**S2.** (Supplementary Table 1). Raman spectra data of MWCNTs-TP interaction products and their comparison with those reported earlier.

**S3.** High resolution image of nano-onion structures.

**S4.** High-resolution image of products in concentrated dispersions TP-MWCNTs.

**S5.** XPS characterization results.

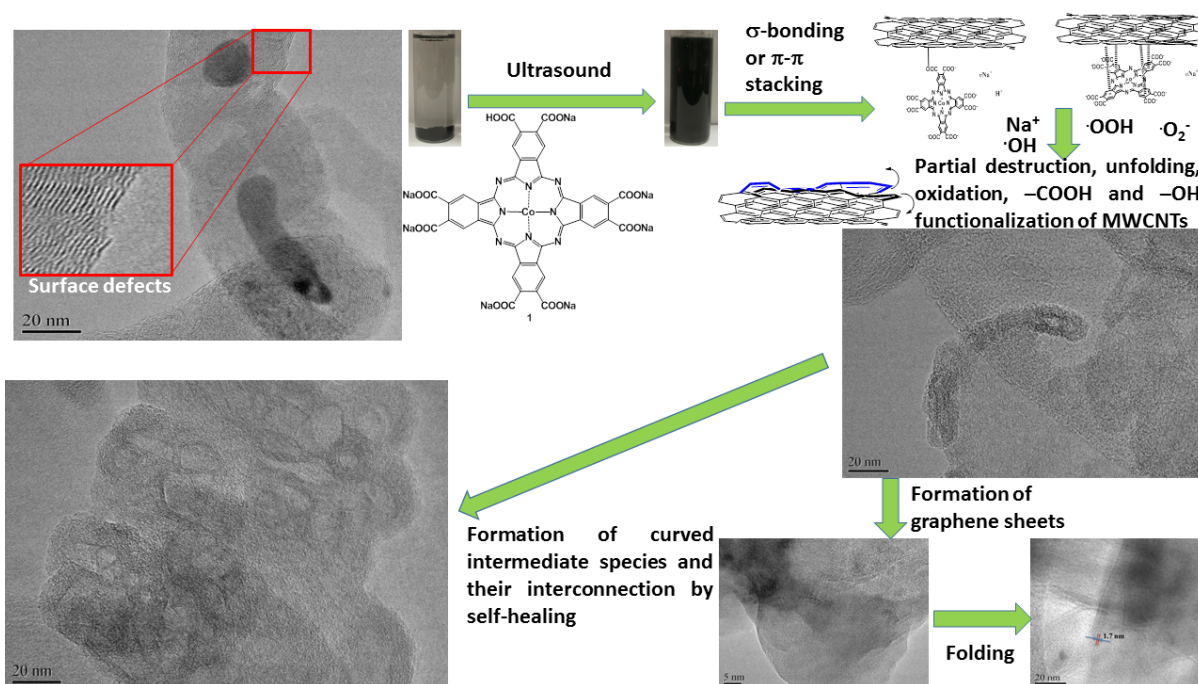

**S1.** Possible formation mechanism for carbon nano-onions and other products in TP-MWCNTs dispersions.

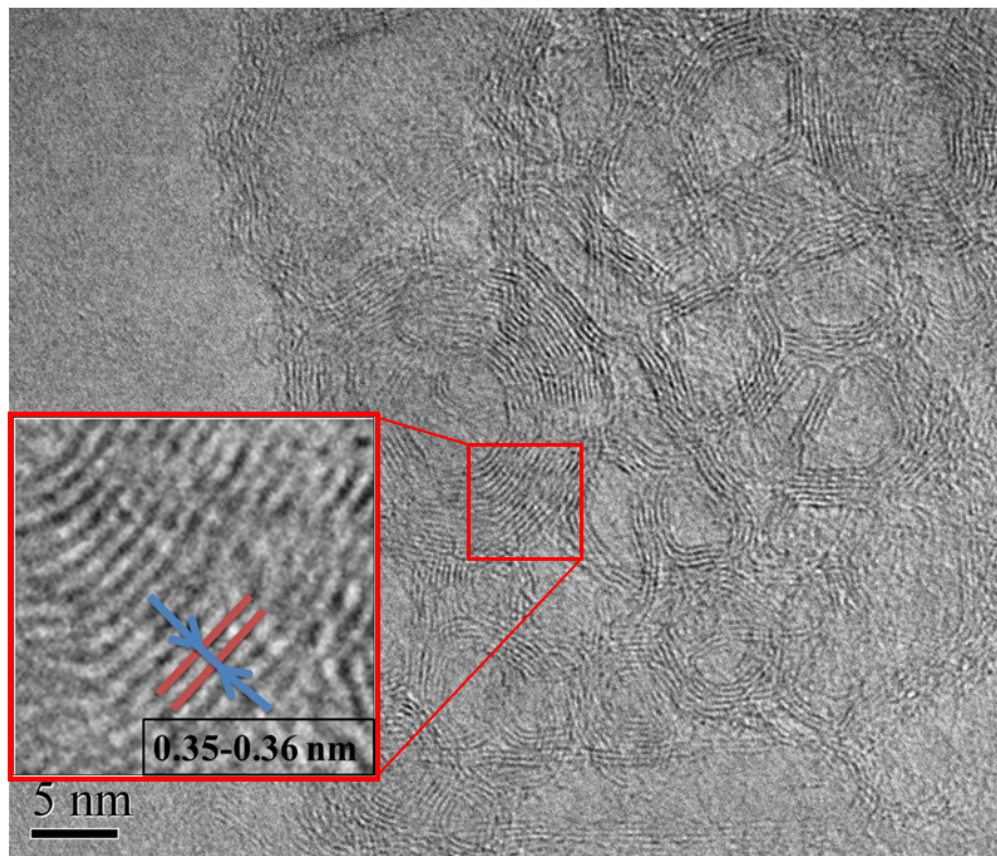

**S3.** High resolution image of nano-onion structures.

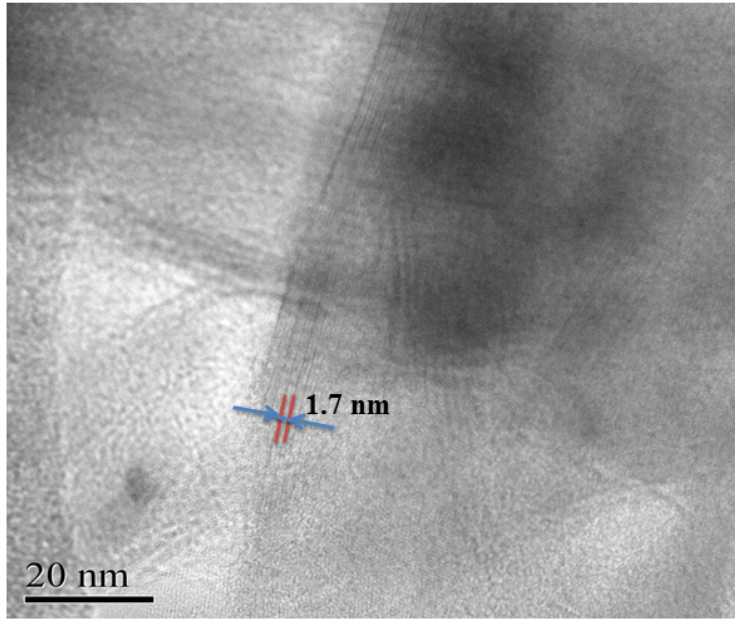

**S4.** High-resolution image of products in concentrated dispersions TP-MWCNTs.

## S5. XPS characterization results.

### Experimental Details

XPS characterization:

The chemical composition of one selected carbon nanotube sample was investigated by X-ray photoelectron spectroscopy (XPS) on a Perkin-Elmer Phi 560 ESCA/SAM system and the spectra were acquired using a non-monochromated Al  $K\alpha$  excitation source. The Al  $K\alpha$  excitation is characteristic unresolved  $K\alpha_{1,2}$  and has a characteristic energy of 1253.6 eV. Survey scans were conducted in the 0 to 1200-eV range at 0.5-eV steps. High-resolution scans were conducted for C 1s peak in the 280 to 294-eV range at 0.1-eV steps.

### Results and Discussion

Fig. (a) presents general XPS survey spectrum of TF-CNT sample exhibiting mainly the presence of C, O, N, Na and Si. This presence of the Si was from the contamination of glass (the samples were synthesized in a glass vial under ultrasonic treatment and dried on glass surface). Fig. (b) shows the high-resolution XPS spectra of the C 1s peak which can be decomposed into the three components at binding energy of 284.4 eV, 286.7 eV and 290.5 eV that can be assigned to  $sp^2$  C=C, C-O (>C=O or C-NH<sub>x</sub>) and O-COO, respectively.<sup>1</sup>

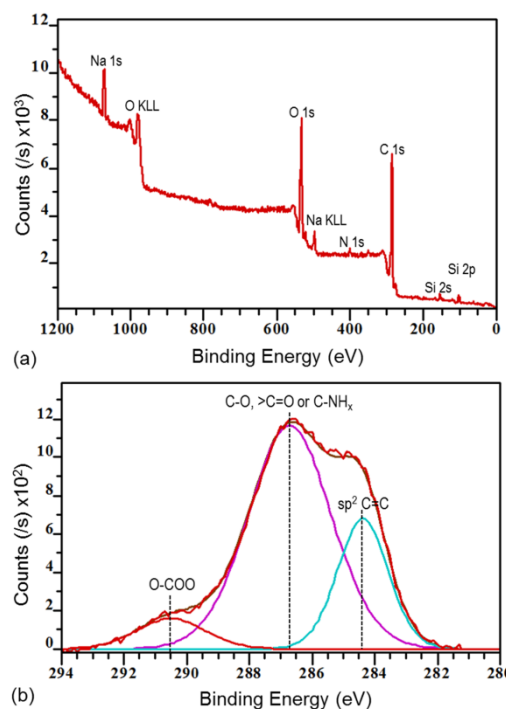

T.I.T. Okpalugo, P. Papakonstantinou, H. Murphy, J. McLaughlin, N.M.D. Brown, High resolution XPS characterization of chemical functionalized MWCNTs and SWCNTs, Carbon 43 (2005) 153–161

**S2. Supplemental Table 1.** Raman spectra data of MWCNTs-TP interaction products and their comparison with those reported earlier.

| <b>Monomeric TP<sup>i</sup></b>   |                                   | <b>MWCNTs;<sup>ii</sup><br/>frequency, cm<sup>-1</sup></b> | <b>Nano-onions;<sup>iii</sup><br/>frequency, cm<sup>-1</sup></b> | <b>MWCNTs-TP<br/>interaction product<br/>containing nano-onions;<br/>frequency, cm<sup>-1</sup></b> |
|-----------------------------------|-----------------------------------|------------------------------------------------------------|------------------------------------------------------------------|-----------------------------------------------------------------------------------------------------|
| <b>Frequency, cm<sup>-1</sup></b> | <b><i>I</i><sub>rel.</sub>, %</b> |                                                            |                                                                  |                                                                                                     |
| 1117                              | 40                                |                                                            |                                                                  | 1040-1070, 1150                                                                                     |
| 1210                              | 90                                |                                                            |                                                                  |                                                                                                     |
| 1320                              | 90                                | 1300-1320                                                  | 1310-1350                                                        | 1300-1320                                                                                           |
| 1396                              | 40                                |                                                            |                                                                  | 1390, 1440                                                                                          |
| 1536                              | 100                               | 1590-1600                                                  | 1600-1630                                                        | 1580-1610<br>1530-1540,<br>1460-1470                                                                |
|                                   |                                   | ~2700                                                      | ~2700, ~2800                                                     | ~2650-2750                                                                                          |

<sup>i</sup> A.V. Feofanov, A.I. Grichine, L.A. Shitova, T.A. Karmakova, R.I. Yakubovskaya, M. Egret-Charlier, P. Vigny. Confocal Raman Microspectroscopy and Imaging Study of Theraphthal in Living Cancer Cells. *Biophys. J.*, 2000, **78**(1), 499–512.

<sup>ii</sup> C. Portet, G. Yushin, Y. Gogotsi. Electrochemical performance of carbon onions, nanodiamonds, carbon black and multiwalled nanotubes in electrical double layer capacitors. *Carbon*, 2007, **45**, 2511–2518.

<sup>iii</sup> J.K. McDonough, A.I. Frolov, V. Presser, J. Niu, C.H. Miller, T. Ubieto, M.V. Fedorov, Y. Gogotsi. Influence of the structure of carbon onions on their electrochemical performance in supercapacitor electrodes. *Carbon*, 2012, **50**, 3298–3309.
